# Supplementary material for: Complete plastid genomes from Ophioglossum californicum, Psilotum nudum, and Equisetum hyemale reveal an ancestral land plant genome structure and resolve the position of Equisetales among monilophytes
Source: PubMed Central journal article supplement (PMC3553075; doi:10.1186/1471-2148-13-8), 2013-01-11

**Supplementary Table 1. DNA sequencing information.**

|                            | <i>Equisetum</i>               | <i>Ophioglossum 1</i>                                              | <i>Ophioglossum 2</i>                                             | <i>Psilotum</i>                |
|----------------------------|--------------------------------|--------------------------------------------------------------------|-------------------------------------------------------------------|--------------------------------|
| <b>Sequencing facility</b> | BGI Americas (bgiamericas.com) | RJ Carver Biotechnology Center, U. Illinois (www.biotech.uiuc.edu) | Core for Applied Genomics and Ecology, U. Nebraska (cage.unl.edu) | BGI Americas (bgiamericas.com) |
| <b>Platform</b>            | Illumina HiSeq2000             | Illumina HiSeq2000                                                 | 454 GS FLX                                                        | Illumina HiSeq2000             |
| <b>Seq. type</b>           | paired-end Illumina            | paired-end Illumina                                                | single pass 454                                                   | paired-end Illumina            |
| <b>No. reads</b>           | 21.0 M                         | 17.9 M                                                             | 0.268 M                                                           | 23.1 M                         |
| <b>Read len.</b>           | 100 bp                         | 100 bp                                                             | 316 bp (mean)                                                     | 100 bp                         |
| <b>Total data</b>          | 2100 M                         | 1790 M                                                             | 84.3 M                                                            | 2310 M                         |
| <b>Library size</b>        | 762 bp (median)                | 910 bp (median)                                                    | N/A                                                               | 760 bp (median)                |

**Supplementary Table 2. Genome sequences used in this study.**

| <b>Species</b>                    | <b>GenBank Acc No</b> | <b>Usage</b>    |
|-----------------------------------|-----------------------|-----------------|
| <b>Angiosperms</b>                |                       |                 |
| <i>Acorus americanus</i>          | DQ069409              | Figure 4        |
| <i>Agrostis stolonifera</i>       | EF115543              | Figure 4        |
| <i>Amborella trichopoda</i>       | AJ506156              | Figure 4        |
| <i>Calycanthus floridus</i>       | AJ428413              | Figure 4        |
| <i>Chloranthus spicatus</i>       | EF380352              | Figure 4        |
| <i>Helianthus annuus</i>          | DQ383815              | Figure 4        |
| <i>Illicium oligandrum</i>        | EF380354              | Figure 4        |
| <i>Liriodendron tulipifera</i>    | DQ899947              | Figure 4        |
| <i>Nymphaea alba</i>              | AJ627251              | Figure 4        |
| <i>Vitis vinifera</i>             | DQ424856              | Figure 4        |
| <b>Gymnosperms</b>                |                       |                 |
| <i>Cephalotaxus wilsoniana</i>    | AP012265              | Figure 4        |
| <i>Cryptomeria japonica</i>       | AP009377              | Figure 4        |
| <i>Cycas taitungensis</i>         | AP009339              | Figures 3 and 4 |
| <i>Ephedra equisetina</i>         | AP010819              | Figure 4        |
| <i>Ginkgo biloba</i>              | AB684440              | Figure 4        |
| <i>Gnetum parvifolium</i>         | AP009569              | Figure 4        |
| <i>Pinus thunbergii</i>           | D17510                | Figure 4        |
| <i>Taiwania cryptomerioides</i>   | AP012266              | Figure 4        |
| <i>Welwitschia mirabilis</i>      | EU342371              | Figure 4        |
| <b>Ferns</b>                      |                       |                 |
| <i>Adiantum capillus-veneris</i>  | AY178864              | Figure 4        |
| <i>Alsophila spinulosa</i>        | FJ556581              | Figure 4        |
| <i>Angiopteris evecta</i>         | DQ821119              | Figures 3 and 4 |
| <i>Cheilanthes lindheimeri</i>    | HM778032              | Figure 4        |
| <i>Equisetum arvense</i>          | GU191334              | Figures 3 and 4 |
| <i>Equisetum hyemale</i>          | KC117177              | Figures 3 and 4 |
| <i>Ophioglossum californicum</i>  | KC117178              | Figures 3 and 4 |
| <i>Psilotum nudum</i>             | KC117179              | Figures 3 and 4 |
| <i>Pteridium aquilinum</i>        | HM535629              | Figure 4        |
| <b>Lycophytes</b>                 |                       |                 |
| <i>Huperzia lucidula</i>          | AY660566              | Figures 3 and 4 |
| <i>Isoetes flaccida</i>           | GU191333              | Figure 4        |
| <i>Selaginella moellendorffii</i> | FJ755183              | Figure 4        |
| <i>Selaginella uncinata</i>       | AB197035              | Figure 4        |
| <b>Hornworts</b>                  |                       |                 |
| <i>Anthoceros formosae</i>        | AB086179              | Figure 3        |
| <b>Mosses</b>                     |                       |                 |
| <i>Physcomitrella patens</i>      | AP005672              | Figure 3        |
| <i>Syntrichia ruralis</i>         | FJ546412              | Figure 3        |
| <b>Liverworts</b>                 |                       |                 |
| <i>Aneura mirabilis</i>           | EU043314              | Figure 3        |
| <i>Marchantia polymorpha</i>      | X04465                | Figure 3        |
| <i>Ptilidium pulcherrimum</i>     | HM222519              | Figure 3        |





## B Nt - 1st + 2nd Position

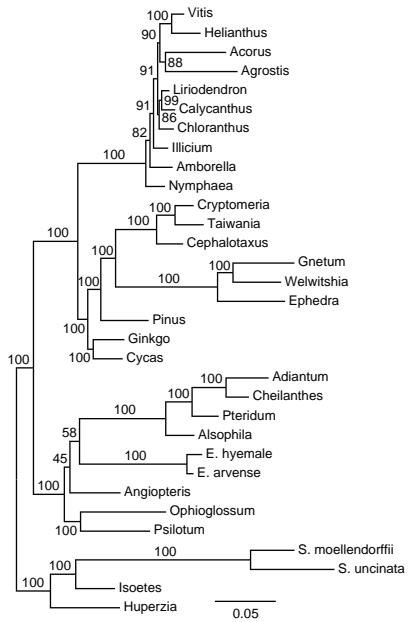

RAxML (GTR+G)

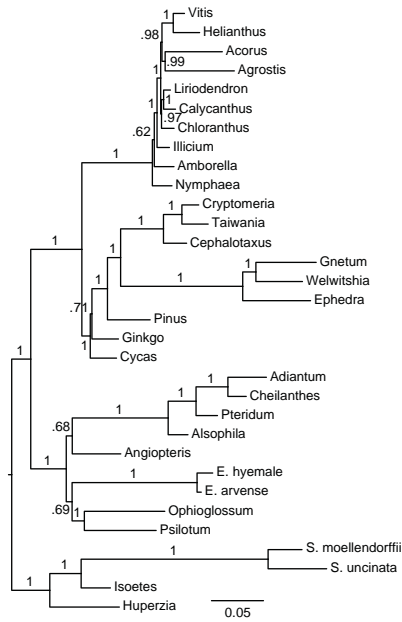

PhyloBayes (CAT-GTR+G)

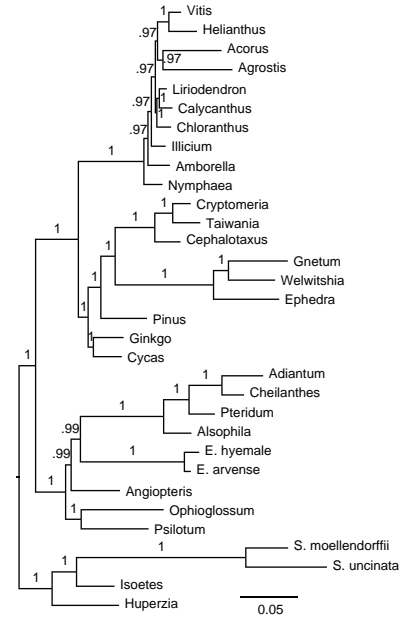

MrBayes (GTR+G)

## C Nt - 3rd Position

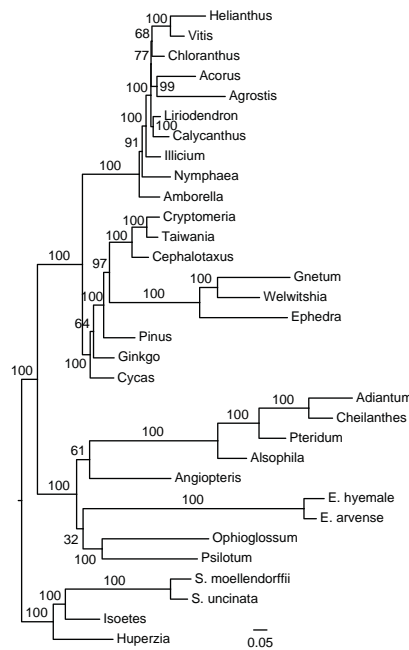

RAxML (GTR+G)

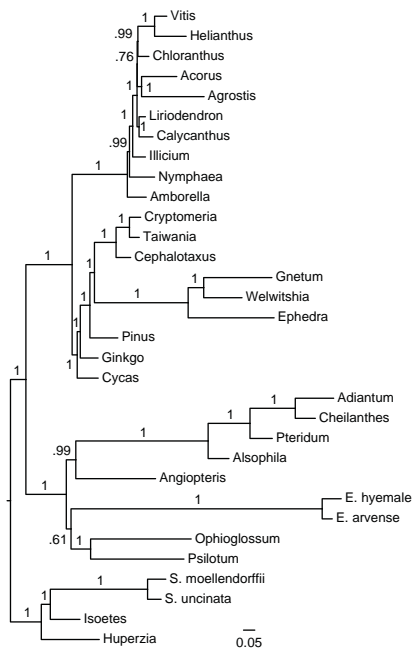

PhyloBayes (CAT-GTR+G)

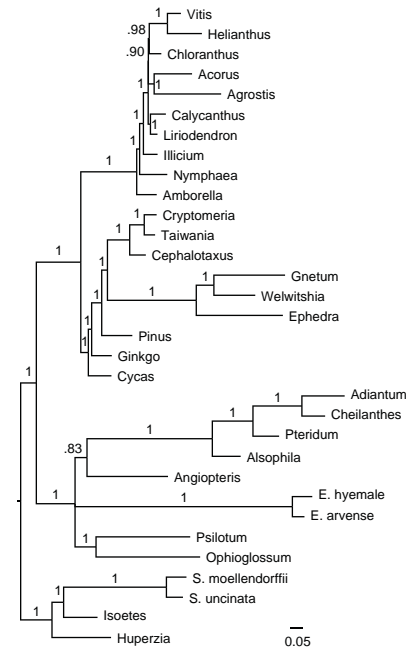

MrBayes (GTR+G)

### D Nt - Reduced

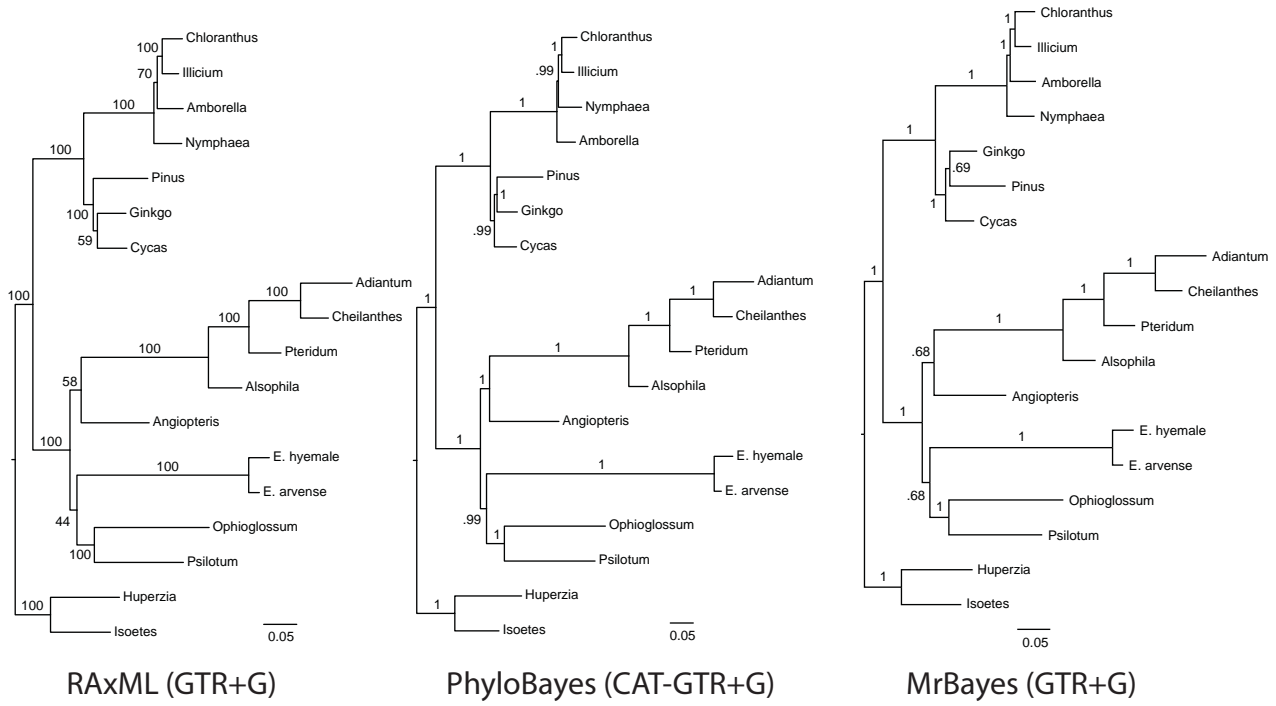

### E AA - Reduced

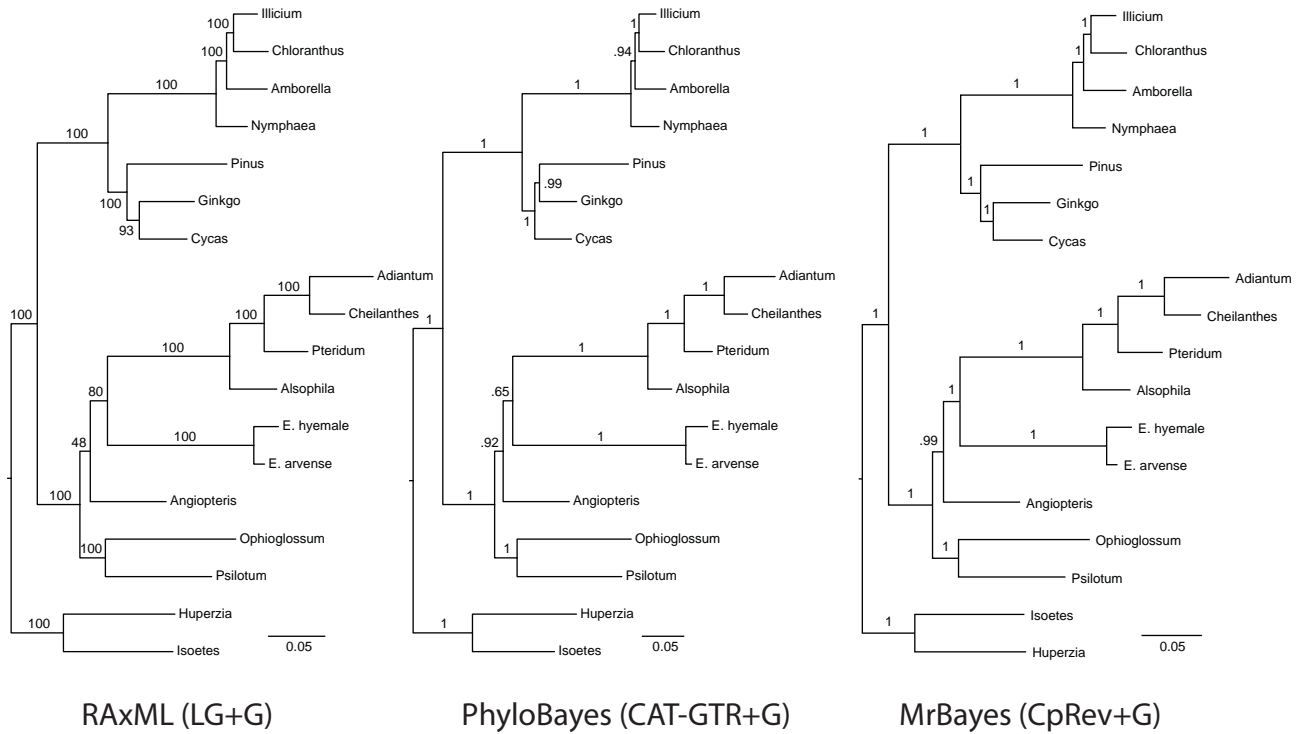

**Supplementary Figure 3 – Depth of sequencing coverage for fern plastomes.** Illumina sequencing reads were mapped onto the finished genomes using Bowtie 2.0.0 (Langmead et al 2012). Depth of coverage was estimated using a window size of 100 and a step size of 10; it is reported on a logarithmic base 2 scale. Mean coverage for each genome is indicated by the dashed horizontal line. Genome position is given in kilobases.

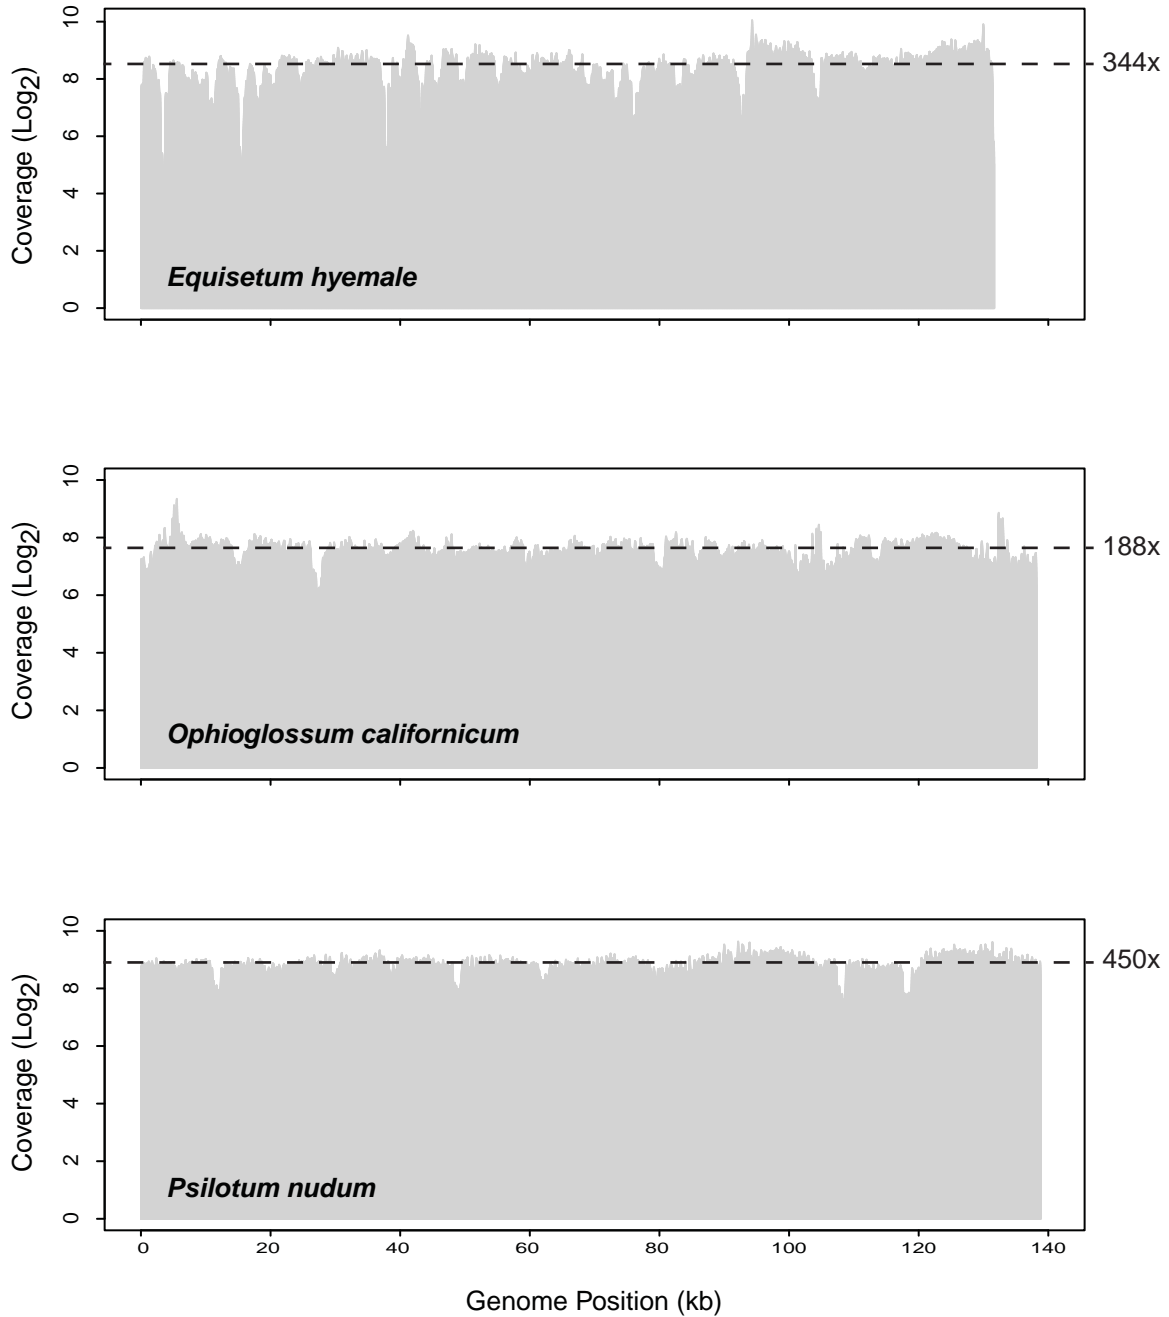

Supplement: 1471-2148-13-8-S1.pdf [file 1471-2148-13-8-S1.pdf]
